# Supplementary material for: Properties of Electrospun Nanofibers of Multi-Block Copolymers of [Poly-ε-caprolactone-b-poly(tetrahydrofuran-co-ε-caprolactone)]m Synthesized by Janus Polymerization
Source: MDPI journal article supplement (doi:10.3390/polym9110559), 2017-10-27
Supplement: s1 [file s1]

**Properties of electrospun nano-fibers of multi-block copolymers of  
[poly- $\epsilon$ -caprolactone-*b*-poly(tetrahydrofuran-*co*- $\epsilon$ -caprolactone)]<sub>m</sub>  
synthesized by Janus polymerization**

Muhammad Ijaz Shah, Zhening Yang, Yao Li, Liming Jiang, Jun Ling\*

MOE Key Laboratory of Macromolecular Synthesis and Functionalization,  
Department of Polymer Science and Engineering, Zhejiang University, Hangzhou  
310027, China.

\* Corresponding author. Email: lingjun@zju.edu.cn

**Supporting Information**

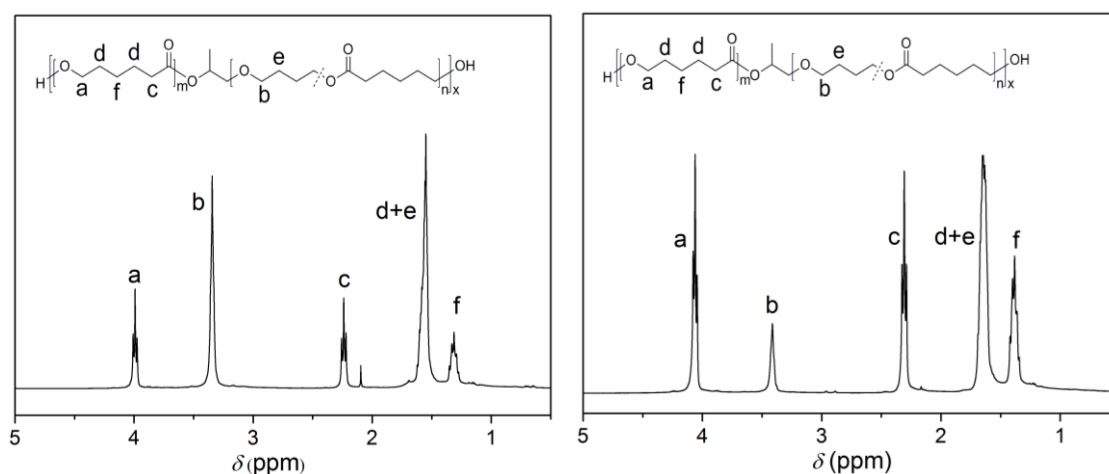

**Figure S1.** <sup>1</sup>H NMR spectra of **P1** (left) and **P2** (right)

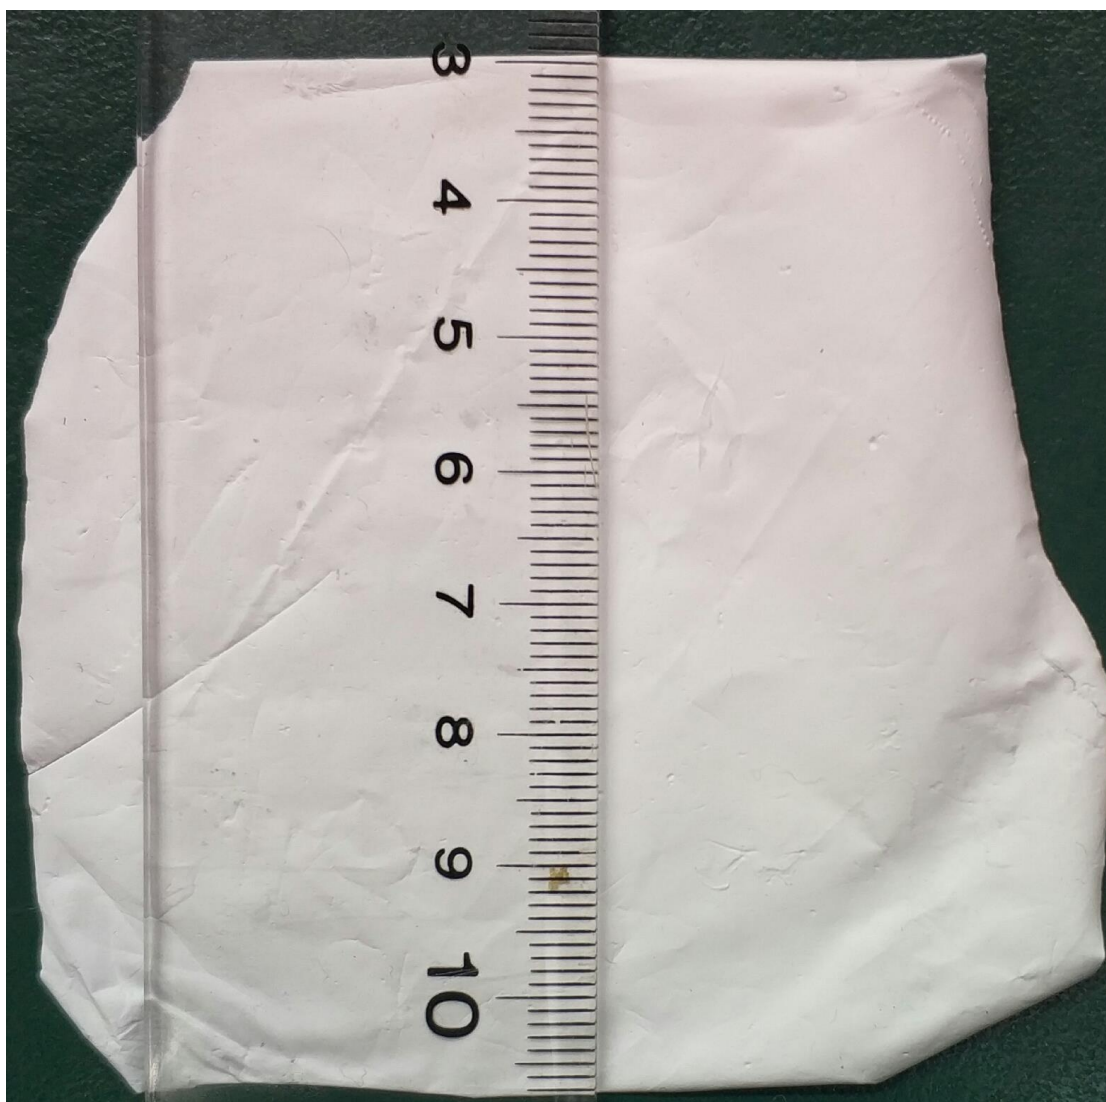

**Figure S2.** Macroscale image of electrospun nanofibers mat
